# Supplementary material for: Identification and Characterization of Nep1-Like Proteins From the Grapevine Downy Mildew Pathogen Plasmopara viticola
Source: PubMed Central journal article supplement (PMC7031652; doi:10.3389/fpls.2020.00065), 2020-02-13
Supplement: DataSheet_1.pdf [file DataSheet_1.pdf]

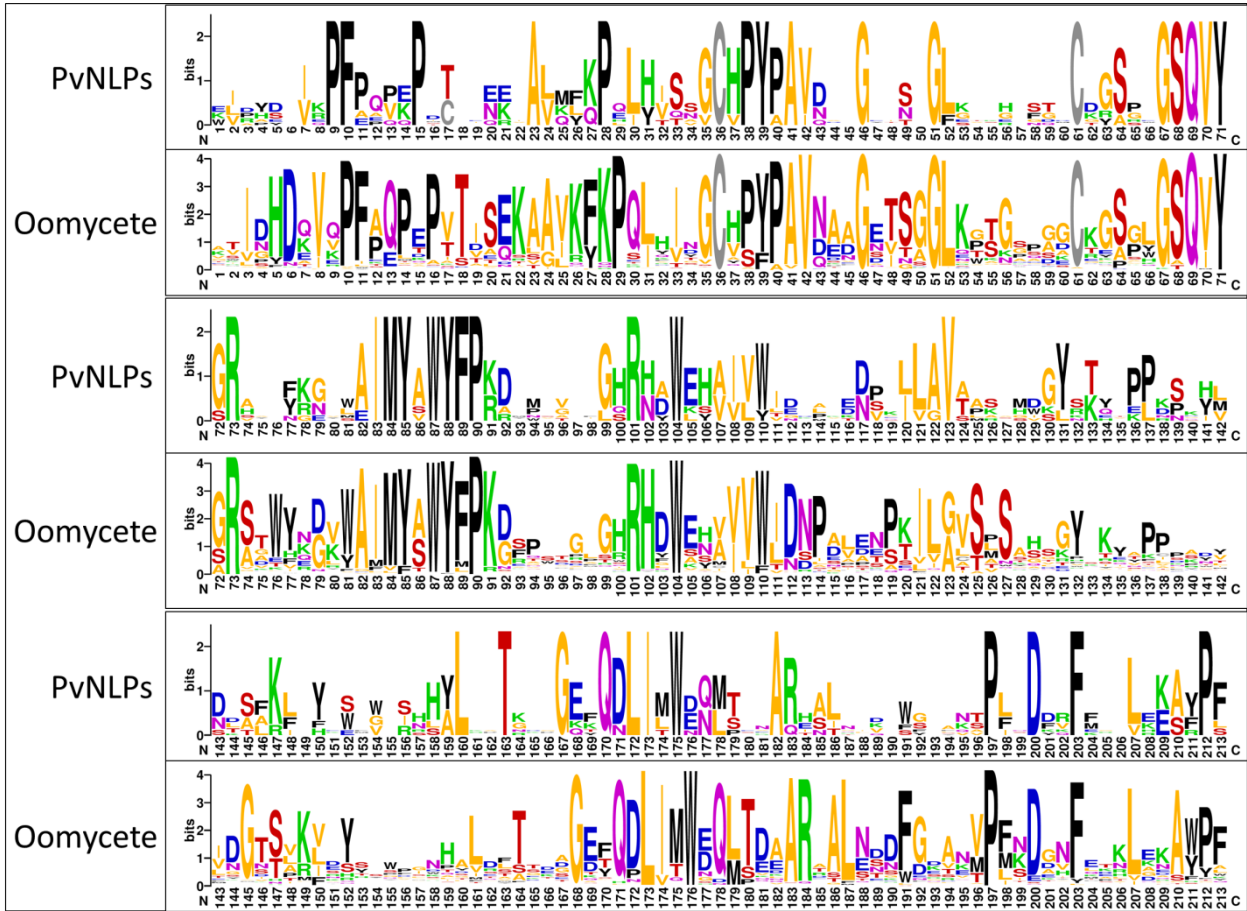

**Supplemental Figure 1: Comparison of *Pv*NLPs with all oomycete NLPs:**

Aligned Weblogos of eight *Pv*NLP sequences and 230 oomycete NLP sequences obtained from Oome and Van den Ackerveken (2014).
