# Supplementary material for: Identification and Characterization of Nep1-Like Proteins From the Grapevine Downy Mildew Pathogen Plasmopara viticola
Source: PubMed Central journal article supplement (PMC7031652; doi:10.3389/fpls.2020.00065), 2020-02-13
Supplement: DataSheet_2.pdf [file DataSheet_2.pdf]

|               |    |                                         |                       |
|---------------|----|-----------------------------------------|-----------------------|
| Pv1306_PvNLP1 | 1  | MSPWEAKWIRHSDVRPFPQPEPMTVEEKVAVMLKPELH  | SSGCHPYPAVNDLGETNGGLK |
| PvNLP1        | 1  | MSPWEAKWIRHSDVRPFPQPEPMTVEEKVAVMLKPELHV | SSGCHPYPAVNDLGETNGGLK |
| Pv1306_PvNLP1 | 61 | TTGAPSGMCKGSGWGSQFTVDTHHLEASGPSCTRGT    | FQKTCRRHTSGIATTGST    |
| PvNLP1        | 61 | TTGAPSGMCKGSGWGSQFTVDTHHLEASGPSCTRGT    | FQKTCRRHTSGIATTGST    |

**Supplemental Figure 2: Amino acids substitution in PvNLP1 from isolate Pv1306**

Grey color indicates amino acids with the same chemical properties.
