# Supplementary material for: Identification and Characterization of Nep1-Like Proteins From the Grapevine Downy Mildew Pathogen Plasmopara viticola
Source: PubMed Central journal article supplement (PMC7031652; doi:10.3389/fpls.2020.00065), 2020-02-13
Supplement: DataSheet_3.pdf [file DataSheet_3.pdf]

|               |     |                                                              |                       |
|---------------|-----|--------------------------------------------------------------|-----------------------|
| Pv1446_PvNLP2 | 1   | MSPWEAKWIRHSEVRPFPOPEPITVEEKVAVMLKPEIHV                      | KNGCHPYPAVNDLGETNSGLK |
| PvNLP2        | 1   | MSPWEAKWIRHSEVRPFPOPEPITVEEKVAVMLKPEIHV                      | TNGCHPYPAVNDLGETNSGLK |
| Pv1446_PvNLP2 | 61  | TKGAPSGMCKGSGWGSQVYGRHALFKGVWAIMYSWYFPKDMPSTDFGHRHDWEHVIVWIE |                       |
| PvNLP2        | 61  | TKGAPSGMCKGSGWGSQVYGRHALFKGVWAIMYSWYFPKDMPSTDFGHRHDWEHVIVWIE |                       |
| Pv1446_PvNLP2 | 121 | KPVVENVKILAVTPSAHDGYSKQVPPNPGHLNGLAAKINYESKWP                | INHALEPTGLGGEKQ       |
| PvNLP2        | 121 | KPVVENVKILAVTPSAHDGYSKQVPPNPGHLNGLAAKINYESKWP                | INHALEPTGLGGEKQ       |
| Pv1446_PvNLP2 | 181 | DLILWEQLSSNARHALNIVHWGDANTPFNDYVFMGKLEKAFPL                  |                       |
| PvNLP2        | 181 | DLILWEQLSSNARHALNIVHWGDANTPFNDYVFMGKLEKAFPL                  |                       |

**Supplemental Figure 3: Amino acid substitution in PvNLP2 from isolate Pv1446**
