# Supplementary material for: Identification and Characterization of Nep1-Like Proteins From the Grapevine Downy Mildew Pathogen Plasmopara viticola
Source: PubMed Central journal article supplement (PMC7031652; doi:10.3389/fpls.2020.00065), 2020-02-13
Supplement: DataSheet_4.pdf [file DataSheet_4.pdf]

|                 |     |                                                                |
|-----------------|-----|----------------------------------------------------------------|
| 1137-C20_PvNLP3 | 1   | MGPWEAKWIRHSDVRPFPPQPEPMTVEEKVAVMLKPELHVSSGCHPYPAVNDLGETNGGLK  |
| Pv1252_PvNLP3   | 1   | MGPWEAKWIRHSDVRPFPPQPEPMTVEEKVAVMLKPELHVSSGCHPYPAVNDLGETNGGLK  |
| Pv1366_PvNLP3   | 1   | MGPWEAKWIRHSDVRPFPPQPEPMTVEEKVAVMLKPELHVSSGCHPYPAVNDLGETNGGLK  |
| Pv1379_PvNLP3   | 1   | MGPWEAKWIRHSDVRPFPPQPEPMTVEEKVAVMLKPELHVSSGCHPYPAVNDLGETNGGLK  |
| PvBr13_PvNLP3   | 1   | MGPWEAKWIRHSDVRPFPPQPEPMTVEEKVAVMLKPELHVSSGCHPYPAVNDLGETNGGLK  |
| PvNLP3          | 1   | MGPWEAKWIRHSDVRPFPPQPEPMTVEEKVAVMLKPELHVSSGCHPYPAVNDLGETNGGLK  |
| 1137-C20_PvNLP3 | 61  | TTGAPSGMCKGSGWGSQIYGRHASFRGVWAIMYVWYFPKDMPSAHFGHRHDWEHVIWVIE   |
| Pv1252_PvNLP3   | 61  | TTGAPSGMCKGSGWGSQIYGRHASFRGVWAIMYVWYFPKDMPSAHFGHRHDWEHVIWVIE   |
| Pv1366_PvNLP3   | 61  | TTGAPSGMCKGSGWGSQIYGRHASFRGVWAIMYVWYFPKDMPSAHFGHRHDWEHVIWVIE   |
| Pv1379_PvNLP3   | 61  | TTGAPSGMCKGSGWGSQIYGRHASFRGVWAIMYVWYFPKDMPSAHFGHRHDWEHVIWVIE   |
| PvBr13_PvNLP3   | 61  | TTGAPSGMCKGSGWGSQIYGRHASFRGVWAIMYVWYFPKDMPSAHFGHRHDWEHVIWVIE   |
| PvNLP3          | 61  | TTGAPSGMCKGSGWGSQIYGRHASFRGVWAIMYVWYFPKDMPSAHFGHRHDWEHVIWVIE   |
| 1137-C20_PvNLP3 | 121 | KPVVENVKILAVTPSFHDGYSKQVPPDPShLNGLAAKF IYSESWP INHALRPTRKGGKKQ |
| Pv1252_PvNLP3   | 121 | KPVVENVKILAVTPSFHDGYSKQVPPDPShLNGLAAKF IYSESWP INHALRPTRKGGKKQ |
| Pv1366_PvNLP3   | 121 | KPVVENVKILAVTPSFHDGYSKQVPPDPShLNGLAAKF IYSESWP INHALRPTRKGGKKQ |
| Pv1379_PvNLP3   | 121 | KPVVENVKILAVTPSFHDGYSKQVPPDPShLNGLAAKF IYSESWP INHALRPTRKGGKKQ |
| PvBr13_PvNLP3   | 121 | KPVVENVKILAVTPSFHDGYSKQVPPDPShLNGLAAKF IYSESWP INHALRPTRKGGKKQ |
| PvNLP3          | 121 | KPVVENVKILAVTPSFHDGYSKQVPPDPShLNGLAAKF IYSESWP INHALRPTRKGGKKQ |
| 1137-C20_PvNLP3 | 181 | DLILWEQMSSNARHALNIVPWGAANTPFNDFVFMGRLEKAFPF                    |
| Pv1252_PvNLP3   | 181 | DLILWEQMSSNARHALNIVPWGAANTPFNDFVFMGRLEKAFPF                    |
| Pv1366_PvNLP3   | 181 | DLILWEQMSSNARHALNIVPWGAANTPFNDFVFMGRLEKAFPF                    |
| Pv1379_PvNLP3   | 181 | DLILWEQMSSNARHALNIVPWGAANTPFNDFVFMGRLEKAFPF                    |
| PvBr13_PvNLP3   | 181 | DLILWEQMSSNARHALNIVPWGAANTPFNDFVFMGRLEKAFPF                    |
| PvNLP3          | 181 | DLILWEQMSSNARHALNIVPWGAANTPFNDFVFMGRLEKAFPF                    |

**Supplemental Figure 4: Amino acid substitution in *PvNLP3* from the isolates *Pv1252*, *Pv1366*, *Pv1379*, *PvBr13* and the single sporangia line 1137-C20**

Grey color indicates amino acids with similar chemical properties.
